# Supplementary material for: A failure in energy metabolism and antioxidant uptake precede symptoms of Huntington’s disease in mice
Source: PubMed Central journal article supplement — Nat Commun. 2013 Dec 13;4:2917. doi: 10.1038/ncomms3917 (PMC3905737; doi:10.1038/ncomms3917), 2013-12-13
Supplement: ncomms3917-s1.pdf [file ncomms3917-s1.pdf]

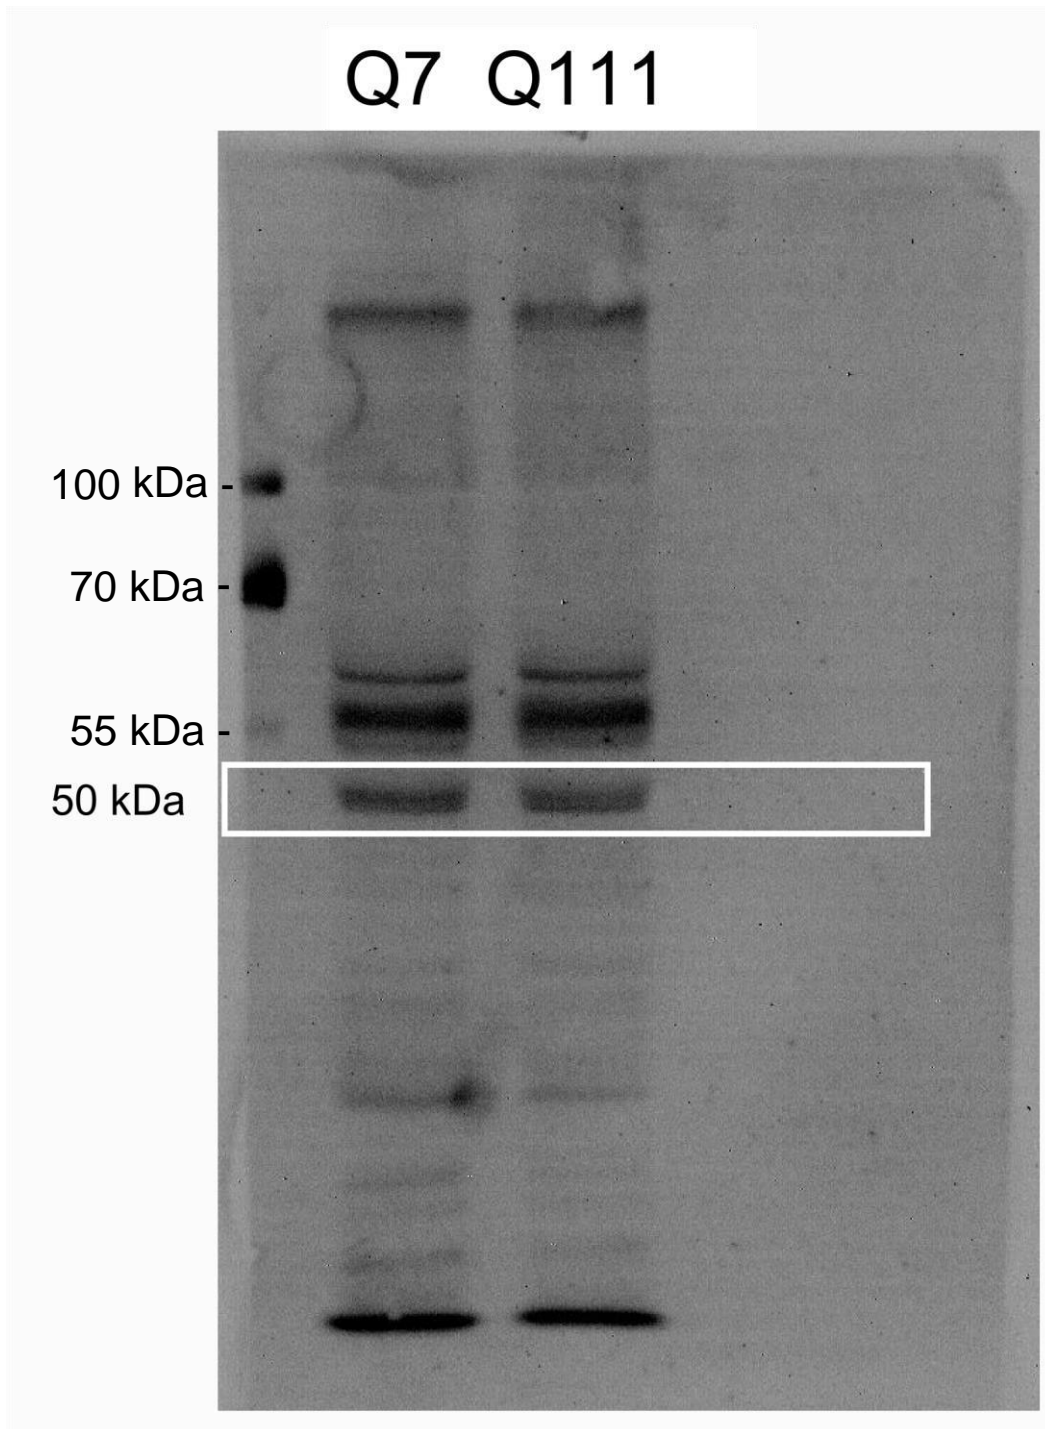

**Supplementary Figure S1 Full unedited blot corresponding to Western blot assay for SVCT2 of total protein extracts from Q7 and Q111 cells.**

Full unedited blot for Figure 2b (SVCT2).

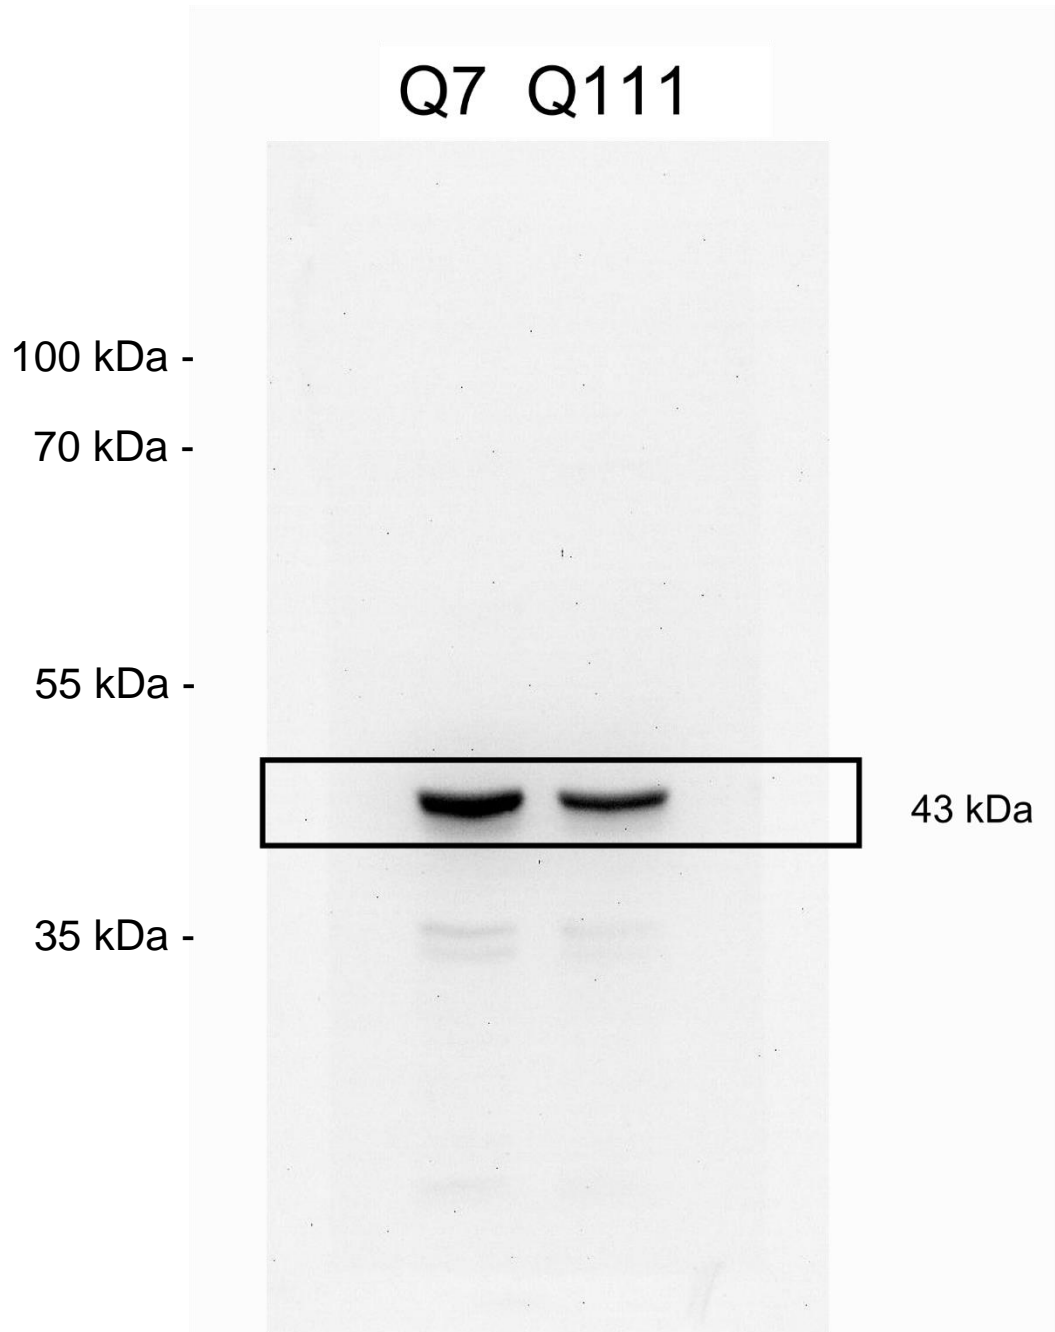

**Supplementary Figure S2 Full unedited blot corresponding to Western blot assay for actin of total protein extracts from Q7 and Q111 cells**

Full unedited blot for Figure 2b (actin).

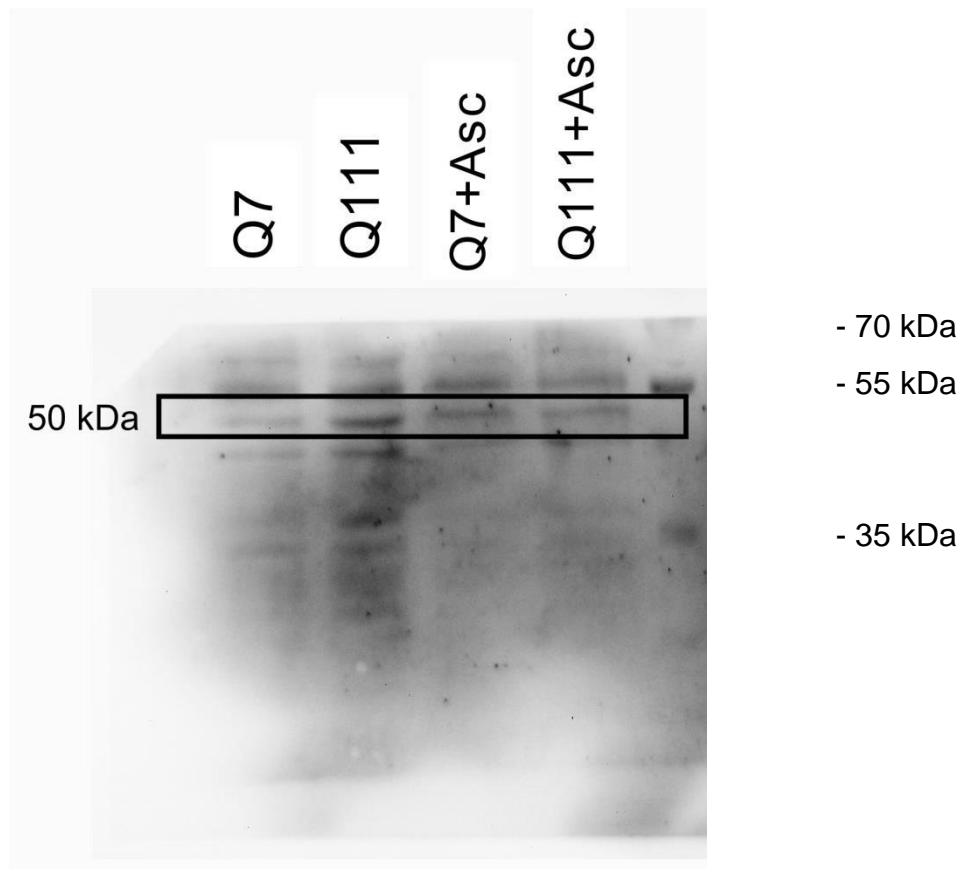

**Supplementary Figure S3 Full unedited blot corresponding to Western blot analysis for SVCT2 of biotinylated proteins from Q7 and Q111 cells**

Full unedited blot for Figure 4e (SVCT2).

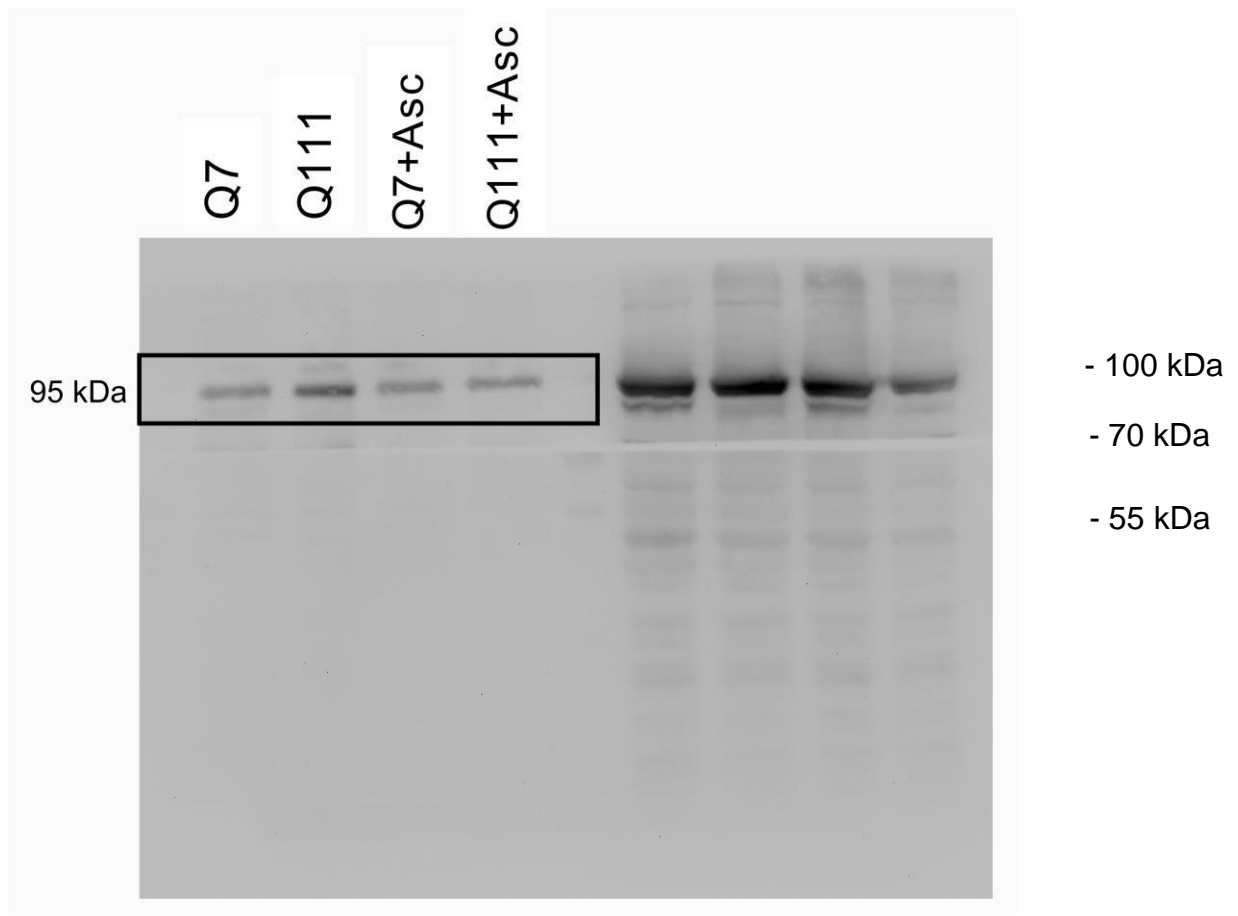

**Supplementary Figure S4 Full unedited blot corresponding to Western blot analysis for transferrin receptor (TfR) of biotinylated proteins from Q7 and Q111 cells** Full unedited blot for Figure 4e (TfR).

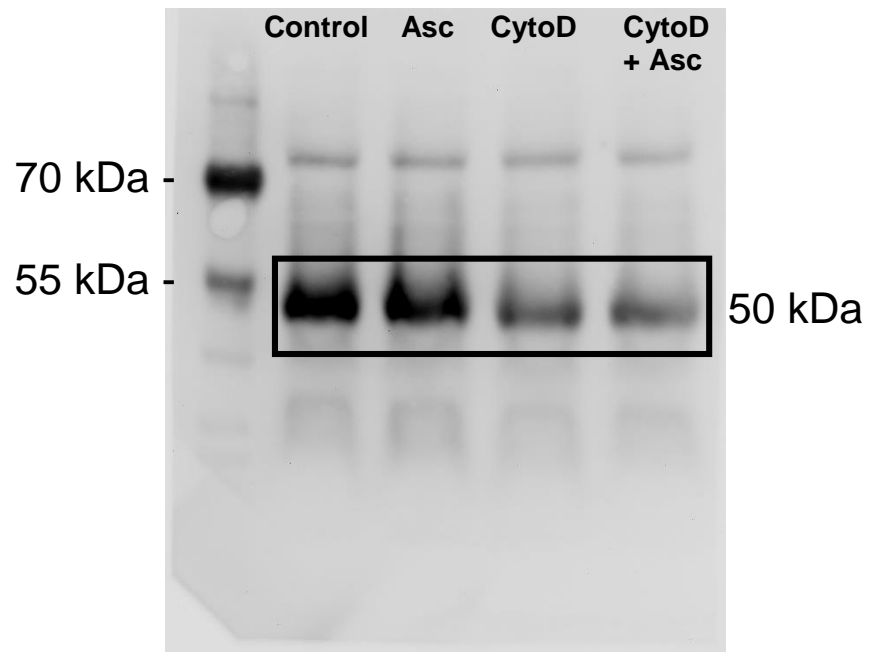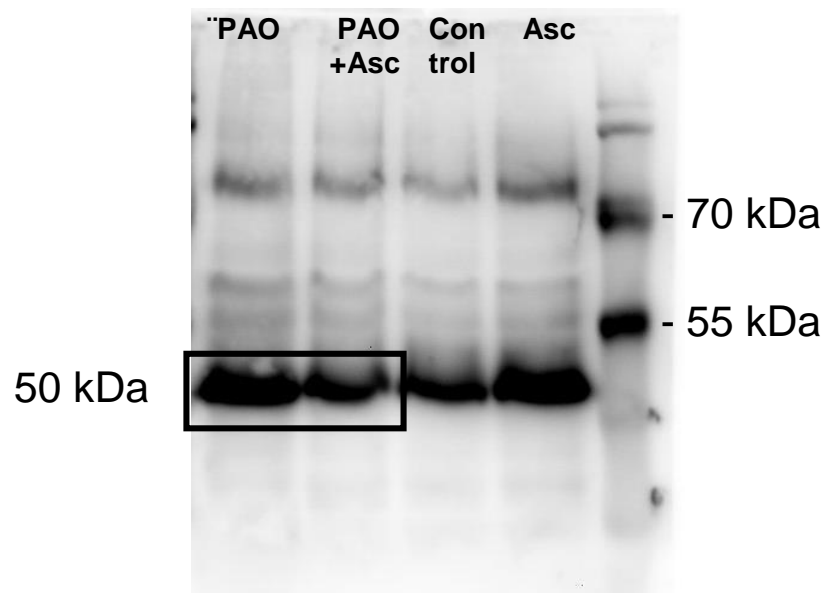

**Supplementary Figure S5 Full unedited blots corresponding to Western blot analyses for SVCT2 of biotinylated proteins from HEK293T cells**

Full unedited blot for Figure 8b (SVCT2).

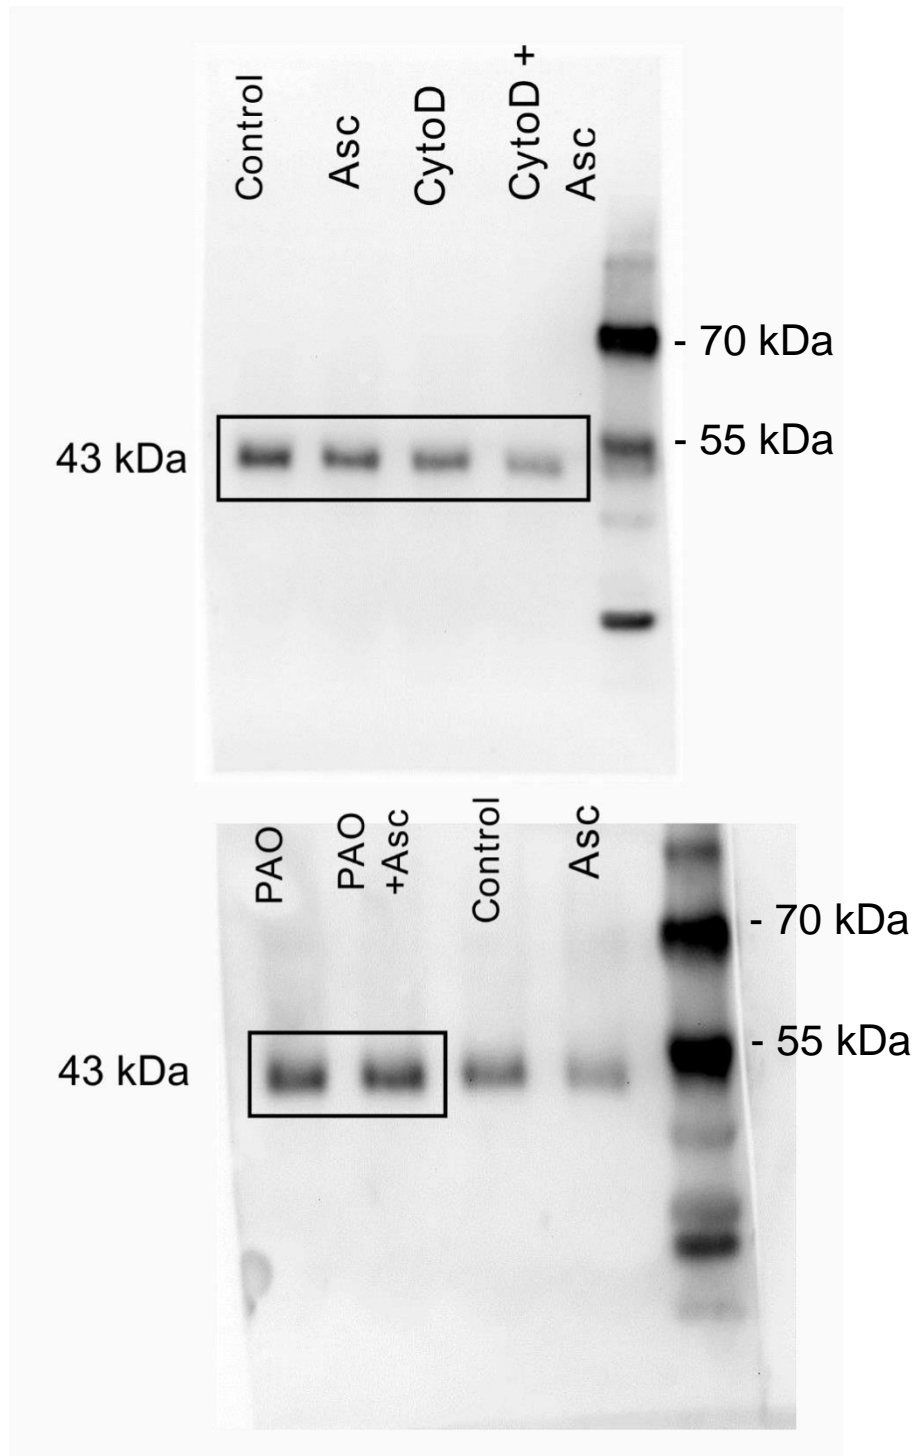

**Supplementary Figure S6 Full unedited blots corresponding to Western blot analyses for actin from protein samples of biotinylated HEK293T cells**

Full unedited blot for Figure 8b (Actin).
